# Supplementary material
Source: publisher site journal article supplement (https://cdn.jamanetwork.com/ama/content_public/journal/peds/929547/poi130071supp1_prod.pdf)
Supplement: Supplementary file 1 [file poi130071supp1_prod.pdf]

## Supplementary Online Content

Marom T, Tan A, Wilkinson GS, Pierson KS, Freeman JL, Chonmaitree T. Trends in otitis media–related health care use in the United States, 2001-2011. *JAMA Pediatr*. Published online November 25, 2013. doi:10.1001/jamapediatrics.2013.3924.

**eTable.** OM-related complications and surgical interventions rates, by age group

**eFigure 1.** Recurrent otitis media rates per child-year, by year

**eFigure 2.** Tympanic perforation/otorrhea rates per 100,000 child-years, according to age group and year

This supplementary material has been provided by the authors to give readers additional information about their work.

**eTable. OM-related complications and surgical interventions rates, by age group**

|                                        | 2001          | 2002          | 2003          | 2004          | 2005          | 2006          | 2007          | 2008          | 2009          | 2010          | 2011          |
|----------------------------------------|---------------|---------------|---------------|---------------|---------------|---------------|---------------|---------------|---------------|---------------|---------------|
| <b>TM perforation/<br/>Otorrhea</b>    |               |               |               |               |               |               |               |               |               |               |               |
| 2-6 years <sup>‡</sup>                 | 2,286         | 2,569         | 2,783         | 2,857         | 2,831         | 2,845         | 3,024         | 2,990         | 3,165         | 3,286         | 3,083         |
| <2 years <sup>‡</sup>                  | 1,365         | 1,357         | 1,474         | 1,402         | 1,501         | 1,740         | 1,563         | 1,600         | 1,413         | 1,380         | 1,428         |
| Rate ratio*                            | 1.68          | 1.89          | 1.89          | 2.04          | 1.89          | 1.64          | 1.93          | 1.87          | 2.24          | 2.38          | 2.16          |
| 95% CI                                 | 1.59-<br>1.76 | 1.80-<br>1.99 | 1.89-<br>1.98 | 1.94-<br>2.14 | 1.80-<br>1.98 | 1.56-<br>1.71 | 1.85-<br>2.03 | 1.78-<br>1.96 | 2.13-<br>2.35 | 2.27-<br>2.50 | 2.06-<br>2.27 |
| <b>Mastoiditis</b>                     |               |               |               |               |               |               |               |               |               |               |               |
| 2-6 years <sup>‡</sup>                 | 31            | 36            | 37            | 44            | 42            | 44            | 37            | 35            | 40            | 33            | 20            |
| <2 years <sup>‡</sup>                  | 27            | 20            | 32            | 32            | 31            | 32            | 39            | 49            | 30            | 23            | 13            |
| Rate ratio*                            | 1.18          | 1.82          | 1.16          | 1.36          | 1.36          | 1.40          | 0.93          | 0.71          | 1.34          | 1.41          | 1.60          |
| 95% CI                                 | 0.82-<br>1.69 | 1.21-<br>2.72 | 0.83-<br>1.61 | 0.96-<br>1.93 | 0.96-<br>1.92 | 0.98-<br>1.99 | 0.68-<br>1.28 | 0.53-<br>0.97 | 0.94-<br>1.90 | 0.95-<br>2.10 | 0.95-<br>2.72 |
| <b>Ventilating tubes<br/>insertion</b> |               |               |               |               |               |               |               |               |               |               |               |
| 2-6 years <sup>‡</sup>                 | 10,716        | 11,590        | 12,697        | 12,238        | 13,211        | 12,281        | 13,153        | 12,431        | 12,563        | 12,649        | 9,684         |
| <2 years <sup>‡</sup>                  | 24,486        | 25,579        | 25,042        | 24,000        | 25,547        | 28,376        | 24,178        | 25,556        | 23,132        | 20,325        | 18,274        |
| Rate ratio*                            | 0.44          | 0.45          | 0.51          | 0.51          | 0.52          | 0.43          | 0.54          | 0.49          | 0.54          | 0.62          | 0.53          |
| 95% CI                                 | 0.43-<br>0.44 | 0.45-<br>0.46 | 0.50-<br>0.51 | 0.50-<br>0.52 | 0.51-<br>0.52 | 0.43-<br>0.44 | 0.54-<br>0.55 | 0.48-<br>0.49 | 0.54-<br>0.54 | 0.61-<br>0.63 | 0.52-<br>0.54 |

<sup>‡</sup>Rates are reported per 100,000 child-years

\*Rate ratio was calculated as the complication rate in children aged 2-6 years, divided by the complication rate in children <2 years.

**eFigure 1. Recurrent otitis media rates per child-year, by year**

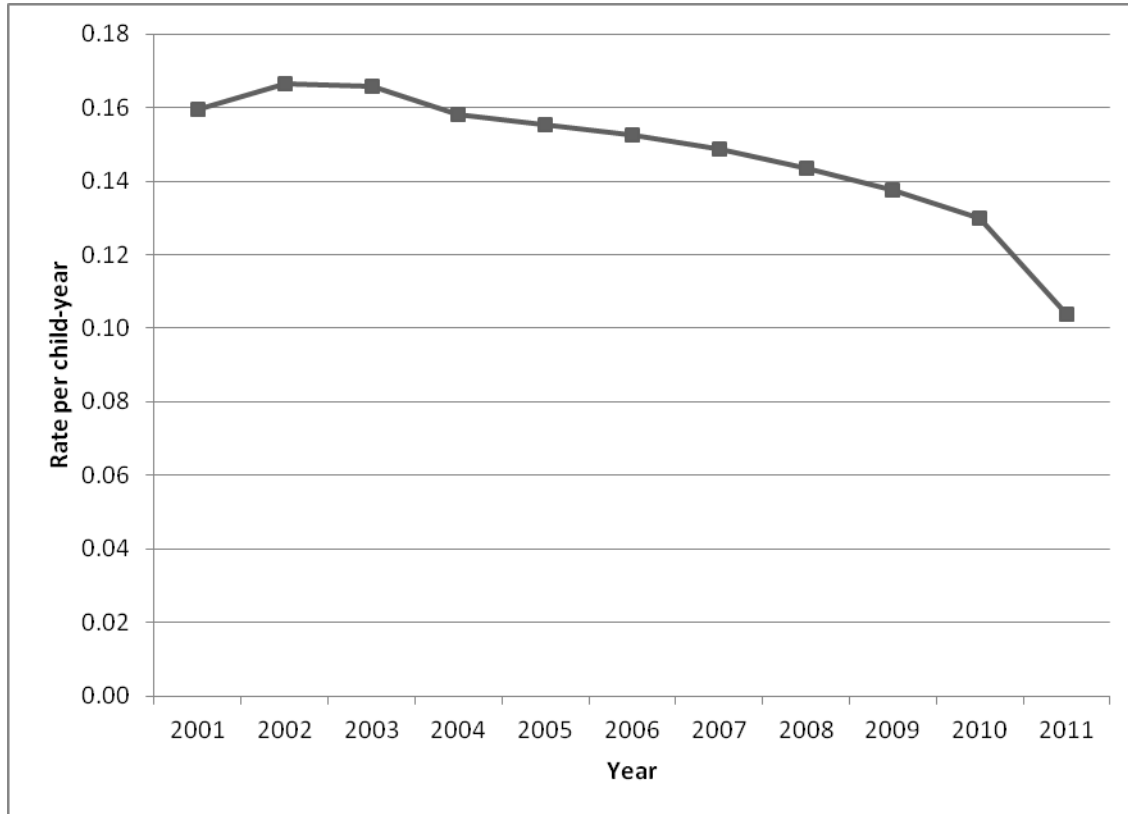

“Recurrent otitis media” was defined as 3 episodes or more of primary otitis media diagnosis within 6 months look-back from the index date, excluding otitis media follow-up visits. Rates are shown per each unique patient; multiple episodes in 6 months of the same patient were counted only once.

Joinpoint analysis found significant change in trends before and after 2010: during 2001-2009, recurrent otitis media rates decreased annually at 0.003/100 child-years (95% CI: 0.002-0.004), and during 2010-2011, recurrent otitis media rates decreased annually at 0.018/100 child-years (95% CI: 0.008-0.028).

**eFigure 2. Tympanic perforation/otorrhea rates per 100,000 child-years, according to age group and year**

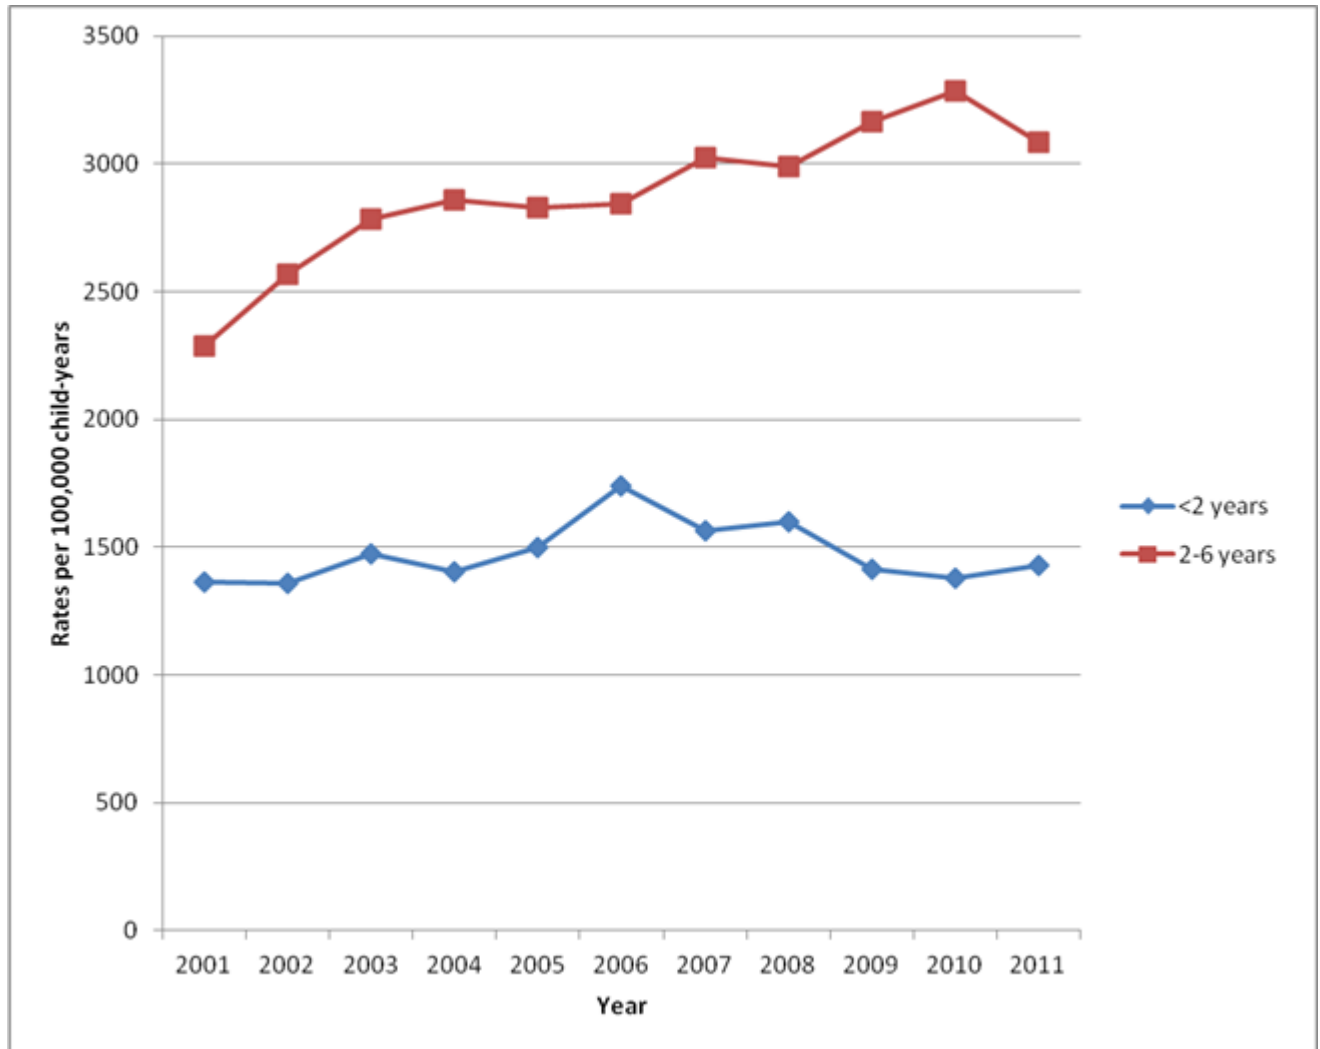

For children aged <2 years, TM perforation/otorrhea rates were stable during 2001-2011.

For children aged 2-6 years, TM perforation/otorrhea rates increased annually by 80.3 (95% CI: 57.0-103.6) per 100,000 child-years. Time trends were significantly different between children aged <2 and children aged 2-6 years.
